# Supplementary material for: Two New M23 Peptidoglycan Hydrolases With Distinct Net Charge
Source: PubMed Central journal article supplement (PMC8498115; doi:10.3389/fmicb.2021.719689), 2021-09-24
Supplement: Data_Sheet_1.pdf [file Data_Sheet_1.pdf]

## *Supplementary material*

**Table S1.** The list of tested bacterial strains.

| <b>Species</b>                         | <b>Strain reference number/isolate</b> |
|----------------------------------------|----------------------------------------|
| <i>Escherichia coli</i>                | TOP10                                  |
| <i>Escherichia coli</i>                | BL21 (DE3)                             |
| <i>Staphylococcus aureus</i>           | NCTC 8325-4                            |
| <i>Staphylococcus aureus</i> *         | RN4220 ( $\Delta$ tagO mutant)         |
| <i>Staphylococcus argensis</i>         | DSM 29875                              |
| <i>Staphylococcus capitis</i>          | PCM 2121                               |
| <i>Staphylococcus pettenkoferi</i>     | DSM 19554                              |
| <i>Staphylococcus pettenkoferi</i> **  | VCU 012                                |
| <i>Staphylococcus pettenkoferi</i> *** | Vasteras_17:1 (V_17:1)                 |
| <i>Staphylococcus pettenkoferi</i> *** | Vasteras_17:2 (V_17:2)                 |
| <i>Staphylococcus pettenkoferi</i> *** | Vasteras_17:3 (V_17:3)                 |
| <i>Staphylococcus pettenkoferi</i> *** | Vasteras_17:4 (V_17:4)                 |
| <i>Staphylococcus pettenkoferi</i> *** | Vasteras_17:5 (V_17:5)                 |
| <i>Staphylococcus pettenkoferi</i> *** | Vasteras_17:6 (V_17:5)                 |
| <i>Staphylococcus pettenkoferi</i> *** | Vasteras_17:7 (V_17:7)                 |
| <i>Staphylococcus pettenkoferi</i> *** | Vasteras_17:8 (V_17:8)                 |
| <i>Staphylococcus pettenkoferi</i> *** | Vasteras_18:1 (V_18:1)                 |
| <i>Staphylococcus saprophyticus</i>    | PCM 2109                               |
| <i>Staphylococcus simulans</i>         | CCM 3583                               |

\* kind gift of the Department of Infection Biology, University of Tübingen

\*\* kind gift of the University of Virginia, USA

\*\*\* environment isolates, kind gift from Department of Orthopedics, Central Hospital Vasteras, Sweden (Mansson et al. 2017).

**Table S2.** List of the constructs and purified proteins used in this study.

| Expression vector   | Produced protein variant, abbreviation                 | Fused tag                                      | Region, length [aa] | Theoretical pI | Mass [Da] |
|---------------------|--------------------------------------------------------|------------------------------------------------|---------------------|----------------|-----------|
| pMCSG7 <sup>1</sup> | Full-length form, M23_A full-length                    | N-terminal his-tag, TEV protease cleavage site | 1-457, 461          | 4.33           | 49829.32  |
| pMCSG7 <sup>1</sup> | Length variant, M23_A <sub>190-457</sub>               | N-terminal his-tag, TEV protease cleavage site | 190-457, 267        | 5.02           | 29182.78  |
| pMCSG7 <sup>1</sup> | Length variant, M23_A <sub>199-457</sub>               | N-terminal his-tag, TEV protease cleavage site | 199-457, 258        | 5.53           | 28136.77  |
| pMCSG7 <sup>1</sup> | Length variant, M23_A <sub>209-457</sub>               | N-terminal his-tag, TEV protease cleavage site | 209-457, 248        | 5.69           | 27379.01  |
| pMCSG7 <sup>1</sup> | Length variant, M23_A <sub>213-457</sub>               | N-terminal his-tag, TEV protease cleavage site | 213-457, 244        | 5.86           | 26551.06  |
| pET22b              | Mature form, M23_A                                     | -                                              | 217-457, 240        | 5.68           | 26455.96  |
| pET22b              | Cell wall targeting domain, CBD_A                      | -                                              | 365-457, 93         | 6.10           | 10524.68  |
| pWALDO <sup>2</sup> | Cell wall targeting domain fused to GFP, CBD_A N-N-D-M | C-terminal GFP and his-tag                     | 365-457, 351        | 6.38           | 39601.30  |
| pWALDO <sup>2</sup> | Cell wall targeting domain fused to GFP, CBD_A D-N-D-M | C-terminal GFP and his-tag                     | 365-457, 351        | 6.28           | 39620.32  |
| pWALDO <sup>2</sup> | Cell wall targeting domain fused to GFP, CBD_A D-T-E-I | C-terminal GFP and his-tag                     | 365-457, 351        | 6.29           | 39603.32  |
| pET22b              | Mature form, M23_B                                     | -                                              | 199-446, 248        | 10.25          | 27194.00  |

<sup>1</sup>Stols, L., Gu, M., Dieckman, L., Raffin, R., Collart, F. R., & Donnelly, M. I. (2002). A new vector for high-throughput, ligation-independent cloning encoding a tobacco etch virus protease cleavage site. *Protein expression and purification*, 25(1), 8–15. <https://doi.org/10.1006/prep.2001.1603>

<sup>2</sup>Waldo, G. S., Standish, B. M., Berendzen, J., & Terwilliger, T. C. (1999). Rapid protein-folding assay using green fluorescent protein. *Nature biotechnology*, 17(7), 691–695. <https://doi.org/10.1038/10904>

**Table S3.** Comparison of amino acid sequence identity and similarity between selected parts of the M23 family enzymes. Numbers marked in **black** correspond to the alignments of the proregion, the **red** to the mature form of the enzymes. The background shades of grey represents the sequence similarity in the decreasing order. The values corresponds to percentage of **identity (bold)** and similarity (in parenthesis) calculated in Blastp algorithm (Altschul et al., 1990).

|                            |       | <i>Aligned aa sequence</i>       |                                  |                                  |
|----------------------------|-------|----------------------------------|----------------------------------|----------------------------------|
|                            |       | Lss                              | Ale-1                            | M23_B                            |
| <i>Aligned aa sequence</i> | M23_A | <b>29</b> (42)<br><b>60</b> (73) | <b>26</b> (52)<br><b>59</b> (72) | <b>34</b> (49)<br><b>65</b> (79) |
|                            | M23_B | <b>50</b> (62)<br><b>60</b> (75) | <b>26</b> (53)<br><b>59</b> (73) | -                                |

**Table S4.** Comparison of amino acid sequence identity and similarity between identified aminoacyltransferases neighbouring *m23\_B* and its homologs. The background shades of grey represents the sequence similarity in the decreasing order. The values corresponds to percentage of **identity (bold)** and similarity (in parenthesis) calculated in Blastp algorithm (Altschul et al., 1990). The Uniprot numbers used for alignment are: aminoacyltransferase from *S.argensis* - WP\_145115830.1; from *S.pettenkoferi* VCU 012 - EHM72111.1 and EHM72136.1; *fmhA* - WP\_001012222.1; *epr* - WP\_100495228.1; *lif* - WP\_172684372.1; *femA* - WP\_000673309.1; *femB* - WP\_000673098.1, *femX* - WP\_000413865.1.

|                                                | Serine incorporation    |                         |                          | Glycine incorporation   |                         |                          |
|------------------------------------------------|-------------------------|-------------------------|--------------------------|-------------------------|-------------------------|--------------------------|
|                                                | FmhA<br><i>S.aureus</i> | Epr<br><i>S.capitis</i> | Lif<br><i>S.simulans</i> | FemA<br><i>S.aureus</i> | FemB<br><i>S.aureus</i> | FemX,<br><i>S.aureus</i> |
| Aminoacyltransferase,<br><i>S.argensis</i>     | <b>61</b> (76)          | <b>61</b> (76)          | <b>59</b> (76)           | <b>40</b> (60)          | <b>35</b> (55)          | <b>24</b> (47)           |
| Aminoacyltransferase,<br><i>S.pettenkoferi</i> | <b>65</b> (81)          | <b>66</b> (80)          | <b>64</b> (79)           | <b>38</b> (60)          | <b>38</b> (57)          | <b>25</b> (48)           |

**Table S5.** Genetic neighborhood of *m23\_B* gene. Predicted function of the elements comprising “*m23\_B* cluster”. Source of presented data is Conserved Domains (Lu et al., 2020) or other servers indicated in the comments

| <i>Function related features</i>                                         |                                                                                         |                                                                  |                                                                                                                                                                                                                |                           |           |                                                                                                                                                                   |
|--------------------------------------------------------------------------|-----------------------------------------------------------------------------------------|------------------------------------------------------------------|----------------------------------------------------------------------------------------------------------------------------------------------------------------------------------------------------------------|---------------------------|-----------|-------------------------------------------------------------------------------------------------------------------------------------------------------------------|
| <b>Protein in <i>S.pettenkoferi</i> (GenBank ID)</b>                     | <b>Conserved domains</b>                                                                | <b>Domain position, E-value</b>                                  | <b>Function</b>                                                                                                                                                                                                | <b>Signal peptide?</b>    | <b>pI</b> | <b>Comment</b>                                                                                                                                                    |
| <b>Acetyltransferase (ASE36561.1)</b>                                    | 1. Peptidoglycan/LPS O-acetylase OafA/YrhL<br>2. YrhL-like subfamily of SGNH-hydrolases | 1.16-369, 2.98e-64<br>2.446-595, 2.19e-56                        | 1. transferring acyl groups other than amino-acyl groups ( <b>transferase</b> )<br>2. family of lipases and esterases ( <b>hydrolase</b> )                                                                     | Yes, membrane protein     | 9.41      | Domains frequently identified together, might be involved in lipid metabolism (InterPro)                                                                          |
| <b>M23_B (ASE36562.1)</b>                                                | 1. Peptidase M23<br>2. SH3b domain                                                      | 1.233-326, 3.61e-36<br>2.365-428, 2.94e-12                       | 1. Gly-Gly <b>hydrolysis</b> (endopeptidase)<br>2. <b>Binding</b> to PG                                                                                                                                        | Yes, YSIRK-type           | 9.36      | -                                                                                                                                                                 |
| <b>Aminoacyltransferase (CEP67_04475, locus tag)</b>                     | FmhA protein of FemAB family                                                            | 6-408, 3.01e-147                                                 | Lipid II:glycine glycy <b>ltransferase</b>                                                                                                                                                                     | No                        | 5.68      | Peptidoglycan interpeptide bridge formation enzyme                                                                                                                |
| <b>LysM peptidoglycan-binding domain-containing protein (ASE36563.1)</b> | 1. Lysin Motif<br>2. Predicted chitinase                                                | 1.412-454, 4.79e-13<br>2.535-692, 8.50e-17                       | 1. N-acetylglucosamine <b>binding</b> domain<br>2. hydrolysis of beta-1,4- linked polysaccharides ( <b>hydrolase</b> )                                                                                         | Yes, YSIRK-type           | 5.68      | Buist et al., 2008                                                                                                                                                |
| <b>Acetyltransferase (ASE36564.1)</b>                                    | Same as for above homolog                                                               | 1.15-386, 1.61e-70<br>2.457-606, 1.65e-58                        | Same as for above homolog                                                                                                                                                                                      | Same as for above homolog | 6.48      | Same as for above homolog                                                                                                                                         |
| <b>LytR family transcriptional regulator (CEP67_04490, locus_tag)</b>    | Anionic cell wall polymer biosynthesis enzyme, LytR-Cps2A-Psr (LCP) family              | 34-286, 1.31e-62                                                 | 1. transferring WTA from their lipid-linked precursor to cell wall PG ( <b>transferase</b> )<br>2. Cell envelope-related function transcriptional attenuator common domain ( <b>transcription regulation</b> ) | No, membrane protein      | 9.59      | Involved in the WTA biosynthesis in Gram-positive bacteria, extracellular domain of putative membrane-bound proteins (Kawai et al., 2011, Eberhardt et al., 2012) |
| <b>LysM peptidoglycan binding domain containing protein (ASE36565.1)</b> | 1. Lysin Motif (two times)<br>2. CHAP domain                                            | 1.412-454, 2.52e-13;<br>471-514, 1.09e-11<br>2.535-692, 8.50e-17 | 1. Same as for above homolog<br>2. hydrolysis of L-muramoyl-L-alanine or D-alanyl-glycyl residues ( <b>amidase/endopeptidase</b> )                                                                             | Yes, YSIRK-type           | 5.60      | Buist et al., 2008                                                                                                                                                |

|              |     |                         |                                                                        |                                                          |                        |                      |            |     |
|--------------|-----|-------------------------|------------------------------------------------------------------------|----------------------------------------------------------|------------------------|----------------------|------------|-----|
|              |     | <b>YSIRK-type motif</b> |                                                                        | <b>Cleavage site of the Signal Peptidase I (Sec/SPI)</b> |                        |                      |            |     |
|              |     | ▼*                      |                                                                        |                                                          |                        |                      |            |     |
| <b>M23_B</b> | 1   | MKSLFKNLHL              | FSIRKLTIGTASV                                                          | MLGSLFILGG                                               | --SHNAHAAENESTINDESNLE | VQQKE                | 58         |     |
| <b>M23_A</b> | 1   | MKRNQSSRRH              | FGIRKLT                                                                | TVGVGSL                                                  | IVGAC                  | LWIHIGDSDVAEAAEVDNAE | -----QVQQT | 54  |
|              |     |                         | ▲                                                                      |                                                          |                        |                      |            |     |
|              |     |                         | <b>Cleavage site of the lipoprotein Signal Peptidase II (Sec/SPII)</b> |                                                          |                        |                      |            |     |
|              |     |                         | *                                                                      |                                                          |                        |                      |            |     |
| <b>M23_B</b> | 59  | TIENESNNENP             | -----                                                                  | -----                                                    | IKTTSQNK               | TLETNSQETNYENQPQENI  | ISS        | 98  |
| <b>M23_A</b> | 55  | DTQGEQQAEEP             | QDEIQNNEAADTTGSQQE                                                     | EAMKTQAEP                                                | RQIETDSGEGK            | -----                | QDLSE      | 108 |
|              |     |                         | *                                                                      |                                                          |                        |                      |            |     |
| <b>M23_B</b> | 99  | TDKAEPTTQNNL            | INEKQNQNET                                                             | QLQLDEDYQSYKSQDKNQL                                      | TQEEISSHKPVNNDKNLP     |                      | 158        |     |
| <b>M23_A</b> | 109 | TASDEQNVEAE             | -AETKANTN                                                              | --NASSENEI                                               | TYQQDKEPQGTED          | --SAQSTQENEEVTP      | 163        |     |
|              |     |                         |                                                                        | *                                                        |                        |                      |            |     |
| <b>M23_B</b> | 159 | SDIEQQ                  | -PNTSISGNQDE                                                           | -----                                                    | NREYAANNTSIDNKQNMNS    | -SVITQ               | 199        |     |
| <b>M23_A</b> | 164 | TEEEKSDED               | INVEGSDQAATQATQQHQDEV                                                  | TEN                                                      | -EINTQESTSETTFFAMP     |                      | 213        |     |

**Figure S1.** Sequence alignment of the M23\_A and M23\_B proregion sequences made in CLUSTAL Omega (Madeira et al., 2019). First amino acid of each predicted repeated sequence regions were indicated with asterisk and whole region was highlighted in frames colored in the shades of grey. The prokaryotic lipoprotein lipid attachment profile was colored in yellow.

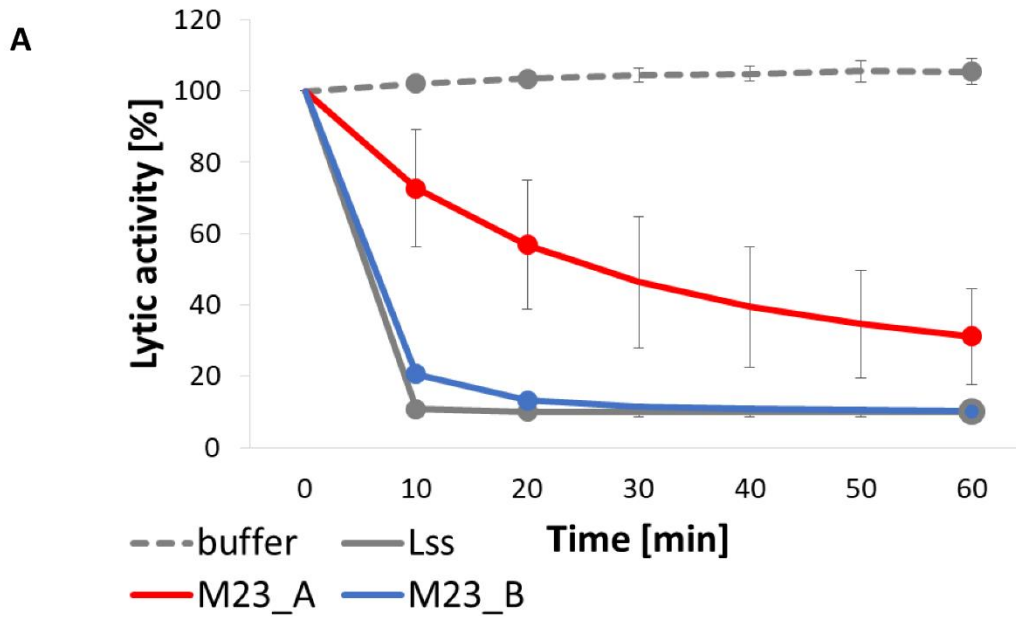

|            | buffer                                                            | Lss                                                                   | M23_A                                                                 | M23_B                                                                 |
|------------|-------------------------------------------------------------------|-----------------------------------------------------------------------|-----------------------------------------------------------------------|-----------------------------------------------------------------------|
| Time [min] | Live cells ( $\pm$ SD) [cfu/ml], <i>Eradicated cells</i> [cfu/ml] |                                                                       |                                                                       |                                                                       |
| 10         | $1.91 (\pm 1.71) \times 10^8$                                     | $1.49 (\pm 1.04) \times 10^4$<br><i><math>1.91 \times 10^8</math></i> | $2.40 (\pm 3.13) \times 10^8$<br>-                                    | $2.07 (\pm 1.45) \times 10^6$<br><i><math>1.89 \times 10^8</math></i> |
| 20         | $1.13 (\pm 1.04) \times 10^8$                                     | $1.50 (\pm 2.34) \times 10^5$<br><i><math>1.13 \times 10^8</math></i> | $8.91 (\pm 4.97) \times 10^7$<br><i><math>2.42 \times 10^7</math></i> | $5.62 (\pm 4.96) \times 10^5$<br><i><math>1.13 \times 10^8</math></i> |
| 60         | $1.64 (\pm 1.47) \times 10^8$                                     | $3.24 (\pm 3.55) \times 10^4$<br><i><math>1.64 \times 10^8</math></i> | $3.82 (\pm 3.16) \times 10^7$<br><i><math>1.26 \times 10^8</math></i> | $5.67 (\pm 5.92) \times 10^5$<br><i><math>1.64 \times 10^8</math></i> |

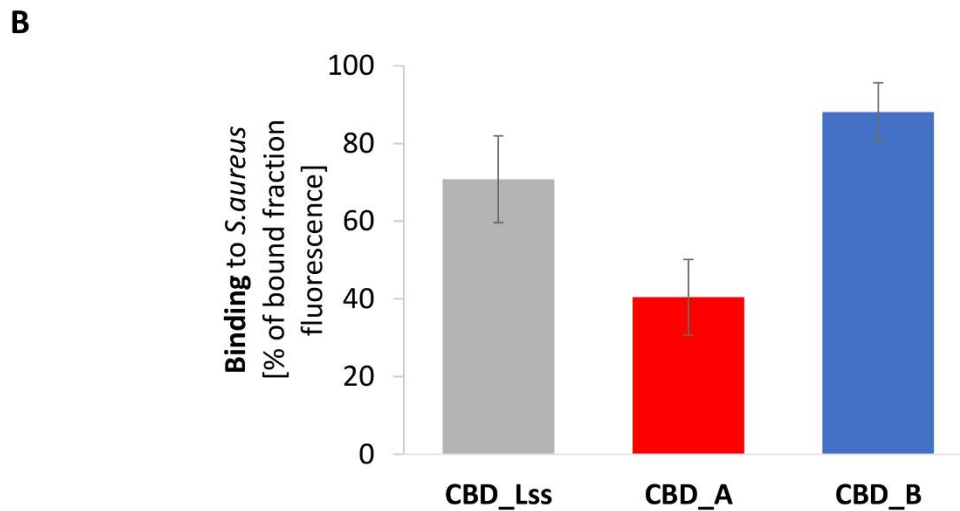

**Figure S2.** Lytic and binding assays of M23\_A, M23\_B and Lss against *S. aureus* NCTC 8325-4.

**A.** Bacterial cells eradication by M23\_A, M23\_B and lysostaphin. Around  $10^8$  CFU/ml of bacterial cells in 50mM glycine buffer was subjected to each enzyme (500nM) or the buffer alone and the decrease of OD<sub>620</sub> was monitored every 10 minutes for 1 hour in room-temperature. At selected time points indicated on the chart with dots, the cells were plated on

the TSB-A in order to monitor live cells, the result of what was summarized in the table. Values presented on the chart are presented in relative [%] to the OD<sub>620</sub> measured at time point zero. Values presented in the table show the live cells counted at each time point and the calculation of the eradicated bacteria in relative to the bacteria suspended in buffer at selected time point. The bars and the values in the table show the SD from three independent experiments.

**B.** Fluorescent binding assay showing the binding efficiency of the recombinant CBD derived from M23\_A, M23\_B or lysostaphin. The fluorescence of negative control (GFP alone) was subtracted from the presented results. The assay was performed in PBS buffer pH 7.2 in RT. The fluorescence was measured upon excitation set at 488nm and emission at 508nm wavelength.



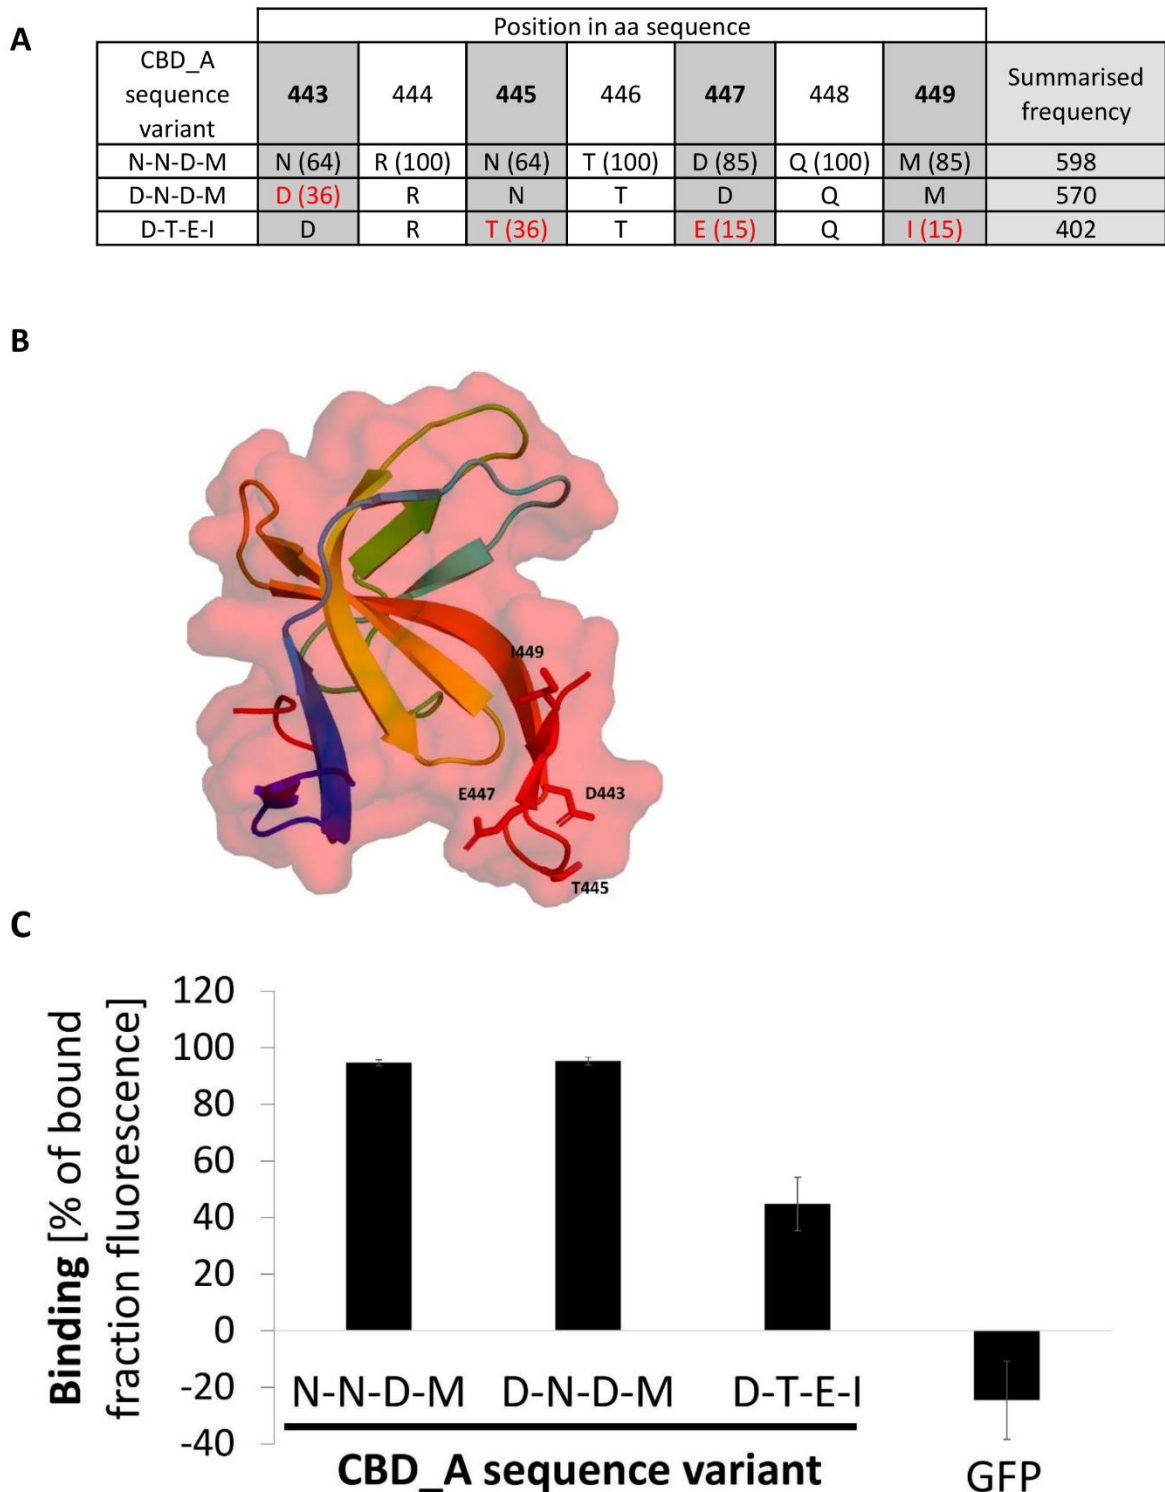

**Figure S3. Comparative analysis of three CBD\_A sequence variants identified in *Staphylococcus* spp.** Variants were named according to the variable amino acid sequence.

**A.** Analysis of CBD\_A sequence variation. In **bold** the variable positions are indicated. In parenthesis the occurrence frequency for each residue is indicated. Frequency of less common amino acid is highlighted in **red**. Summarised frequency score indicates the frequency of each variant occurrence. All listed CBD\_A variants were subjected to binding assay.

**B.** The model of CBD\_A D-T-E-I variant presented in the cartoon and transparent surface (40%) representations (SWISS-Model, Waterhouse et al., 2018). The spectrum of colors indicates the secondary structures order. The N-terminal CBD\_A is shown in blue and the C-terminal in red. The localization of variable residues is marked with their side chains represented as sticks.

**C.** Binding assay for CBD\_A fused to GFP performed on *Staphylococcus aureus* RN4220  $\Delta$ tagO. This mutant was selected because CBD\_A displayed the highest binding efficiency toward its cell wall. The assay was performed in PBS, pH 7.2, at room temperature. Bacterial cells were mixed with 1  $\mu$ M of each fluorescently labeled CBD\_A. Cells were pelleted and the fluorescence (excitation: 488 nm, emission: 508 nm) of the unbound fraction of each CBD\_A was measured. Results are expressed relative to sample without the addition of bacterial cells. The fluorescence of the negative control (GFP without CBD\_A) is indicated on the chart as “GFP”.

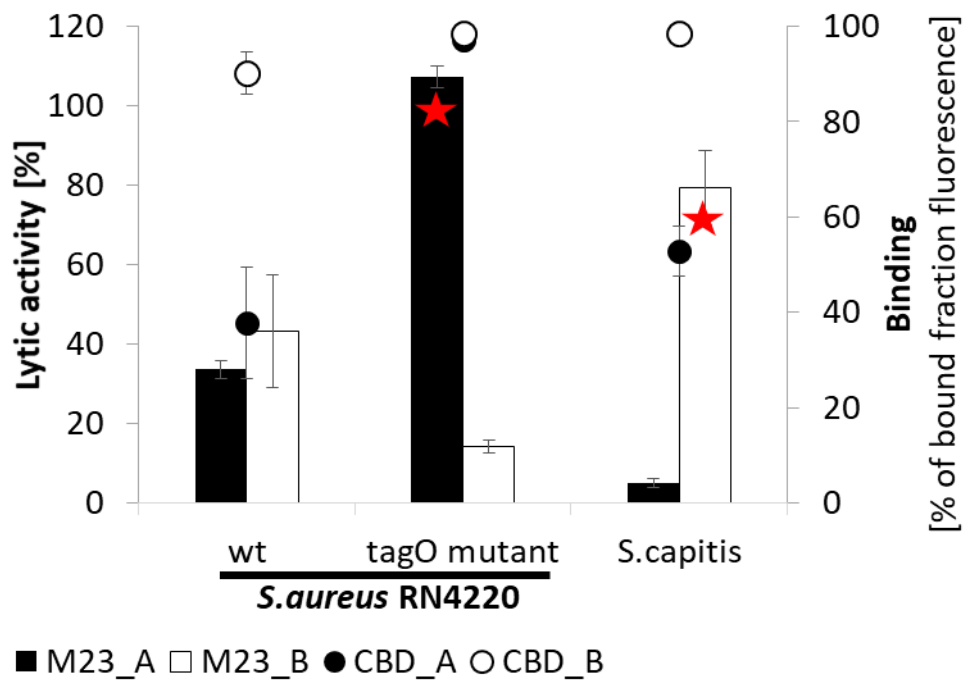

**Figure S4.** Lytic and binding assay performed in order to select the *Staphylococcus* species suitable for the binding and *in vivo* bioactivity assay. Susceptible *S. aureus*  $\Delta$ tagO and *S. capitis* were lysed exclusively by M23\_A or M23\_B, thus were selected for the lawn formation for *in vivo* bioactivity assay as indicated with a red star. The lytic activity values indicated the OD<sub>600</sub> decrease after 1h of reaction. The bacteria suspended in the reaction buffer without addition of the lytic enzyme were treated as negative control and the OD<sub>600</sub> decrease values obtained for this variant were subtracted from the presented values. Assay was performed in 50mM glycine buffer pH 8.0, 100mM NaCl. The binding assay performed on the same species show the efficacy of binding of each recombinant CBD domain, indicative for that it could be used for the cross-bridge blocking. The binding assay was performed in PBS buffer pH 7.2 in RT. The fluorescence was measured upon excitation set at 488nm and emission at 508nm wavelength. The fluorescence of negative control (GFP alone) was subtracted from the presented results.

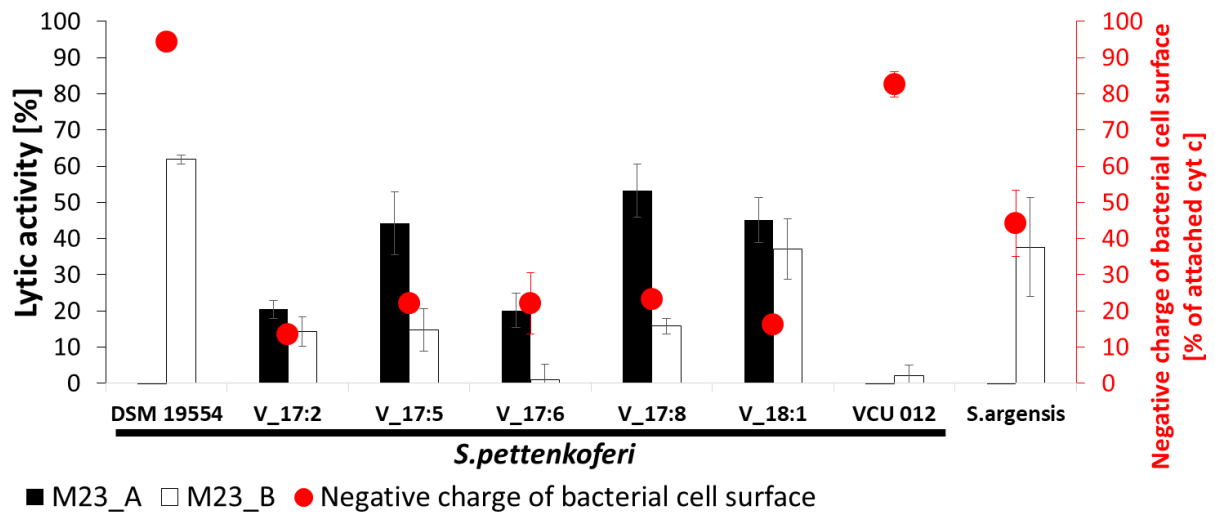

**Figure S5.** Lytic specificity of M23\_A and M23\_B toward host strains of their genes in M23\_B buffer optimal conditions. Assay was performed in 50mM glycine buffer pH 8.0, 100mM NaCl. The lytic activity values indicated the OD<sub>600</sub> decrease after 1h of reaction. The bacteria suspended in the reaction buffer without addition of the lytic enzyme were treated as negative control and the OD<sub>600</sub> decrease values obtained for this variant were subtracted from the presented values. The red dots indicates the negative charge of each bacterial cell surface estimated in CytC assay, performed in the ammonium acetate buffer pH 4.6. All experiments were performed 3 times.

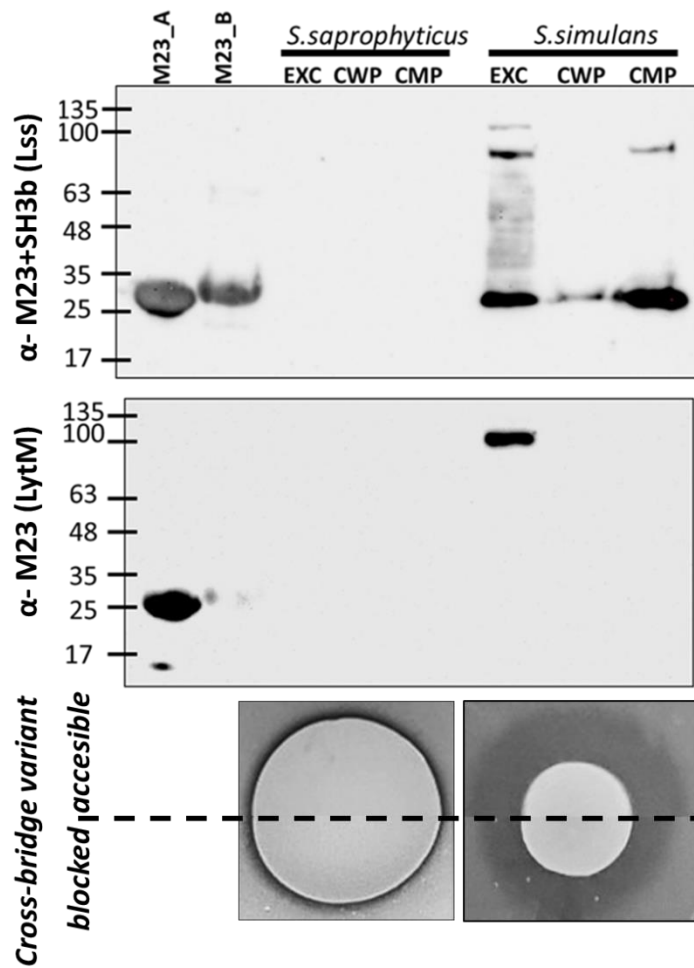

**Figure S6.** Western blot analysis investigating the cellular extracts of *S. saprophyticus* (close relative to *S. pettenkoferi*, negative control for M23\_A production) and *S. simulans* (producer of the best characterized M23 enzyme, lysostaphin) serving as the control panel for analysis presented in **Figure 4**. EXC: extracellular fraction (concentrated 25-fold); CWP: LiCl-extracted cell wall protein fraction (concentrated 100-fold); CMP: SDS-extracted cell membrane protein fraction (concentrated 100-fold). Bioactivity assay of respective bacterial cultures against same bacterial lawn, as was used in *S. pettenkoferi* bioactivity assay, namely *S. aureus*  $\Delta$ tagO.
